# Supplementary material for: Frontal Fibrosing Alopecia Quality of Life Index: A Validated Disease-Specific Questionnaire Involving Women
Source: MDPI journal article supplement (doi:10.3390/jcm12030824), 2023-01-20
Supplement: s1 [file s1]

Supplementary Materials:

**Table S1.** Frontal Fibrosing Alopecia Quality of Life Index (FFA-QLI). English version (non-validated);

|                                                                                                                                                                                              |
|----------------------------------------------------------------------------------------------------------------------------------------------------------------------------------------------|
| <b>Emotional</b>                                                                                                                                                                             |
| 1. Do you feel like you are not the same person because of having lost your eyebrows?<br>0. No. / I have not lost my eyebrows.<br>1. Yes, a little.<br>2. Yes, a lot.<br>3. Yes, very much.  |
| 2. Have you lost your self-confidence?<br>0. Not at all.<br>1. Yes, a little.<br>2. Yes, a lot.<br>3. Yes, very much.                                                                        |
| 3. Would you prefer to suffer from an internal disease, more serious but not visible, instead of alopecia?<br>0. Not at all.<br>1. Yes, a little.<br>2. Yes, a lot.<br>3. Yes, very much.    |
| 4. Do you feel itchy or pain in your scalp?<br>0. Not at all.<br>1. Yes, a little.<br>2. Yes, a lot.<br>3. Yes, very much.                                                                   |
| 5. Are you worried about eyebrow loss?<br>0. Not at all.<br>1. Yes, a little.<br>2. Yes, a lot.<br>3. Yes, very much.                                                                        |
| 6. Are you worried about scalp hair loss?<br>0. Not at all.<br>1. Yes, a little.<br>2. Yes, a lot.<br>3. Yes, very much.                                                                     |
| 7. Do you think that your alopecia alters your body image?<br>0. Not at all.<br>1. Yes, a little.<br>2. Yes, a lot.<br>3. Yes, very much.                                                    |
| <b>Social</b>                                                                                                                                                                                |
| 8. Do you feel that your look interferes with your work?<br>0. Not at all. / No, I am already retired.<br>1. Yes, a little.<br>2. Yes, a lot.<br>3. Yes, very much.                          |
| 9. Have you stopped going to the hairdresser's or reduced the frequency you go there because of the alopecia?<br>0. Not at all.<br>1. Yes, a little.<br>2. Yes, a lot.<br>3. Yes, very much. |
| 10. Do you feel that people look at you (stare at you) because of your alopecia?<br>0. Not at all.<br>1. Yes, a little.                                                                      |

|                                                                                                                                                                                                                                                                                                                                |
|--------------------------------------------------------------------------------------------------------------------------------------------------------------------------------------------------------------------------------------------------------------------------------------------------------------------------------|
| 2. Yes, a lot.<br>3. Yes, very much.                                                                                                                                                                                                                                                                                           |
| 11. Have you given up activities that you used to do because of your alopecia (leisure, sport,...)?<br>0. Not at all.<br>1. Yes, a little.<br>2. Yes, a lot.<br>3. Yes, very much.                                                                                                                                             |
| 12. Do you feel that your alopecia interferes with your sex life?<br>0. Not at all.<br>1. Yes, a little.<br>2. Yes, a lot.<br>3. Yes, very much.                                                                                                                                                                               |
| 13. Do you feel that your alopecia interferes with your relationship with your partner?<br>0. Not at all.<br>1. Yes, a little.<br>2. Yes, a lot.<br>3. Yes, very much.                                                                                                                                                         |
| 14. Do you feel that your alopecia interferes with your relationship with your friends?<br>0. Not at all.<br>1. Yes, a little.<br>2. Yes, a lot.<br>3. Yes, very much.                                                                                                                                                         |
| <b>Functional</b>                                                                                                                                                                                                                                                                                                              |
| 15. Do you waste time trying to hide your alopecia (eyebrows or scalp)?<br>0. Not at all.<br>1. Yes, a little.<br>2. Yes, a lot.<br>3. Yes, very much.                                                                                                                                                                         |
| 16. Do you comb your hair differently than usual to hide your alopecia?<br>0. Not at all.<br>1. Yes, a little.<br>2. Yes, a lot.<br>3. Yes, very much.                                                                                                                                                                         |
| 17. Have you changed the frequency of combing or washing your hair because of fear of increasing your hair loss?<br>0. Not at all.<br>1. Yes, a little.<br>2. Yes, a lot.<br>3. Yes, very much.                                                                                                                                |
| 18. Do you forget about your alopecia at any moment?<br>0. Yes, a lot of the time.<br>1. Yes, quite often.<br>2. Yes, but rarely.<br>3. No, never.                                                                                                                                                                             |
| 19. Do you make-up your eyebrows to hide the alopecia or have them tattooed?<br>0. No. / No, I have not lost my eyebrows.<br>1. Yes, I use make-up on them occasionally.<br>2. Yes, I use make-up on them quite often.<br>3. Yes, I use make-up on them everyday. / Yes, I have eyebrow tattoos to cover the eyebrow alopecia. |
| 20. Do you use any type of wig or capilar prothesis to hide your alopecia?<br>0. No, never.<br>1. Yes, occasionaly.<br>2. Yes, quite often.<br>3. Yes, always.                                                                                                                                                                 |
| <b>Score:</b> mild impairment (< 21), moderate impairment (21-35), severe impairment (> 35)                                                                                                                                                                                                                                    |

**Table S2.** Alopecia Frontal Fibrosante Índice de Calidad de Vida (AFF-ICV) (Original version of the validated questionnaire)

|                                                                                                                                                                                                                   |
|-------------------------------------------------------------------------------------------------------------------------------------------------------------------------------------------------------------------|
| <b>Emocional</b>                                                                                                                                                                                                  |
| 1. ¿Siente que no es usted mismo/a al haber perdido las cejas?<br>0. No. / No las he perdido.<br>1. Sí, un poco.<br>2. Sí, bastante.<br>3. Sí. Mucho.                                                             |
| 2. ¿Ha perdido la confianza en usted mismo/a?<br>0. No.<br>1. Sí, un poco.<br>2. Sí, bastante.<br>3. Sí, mucho.                                                                                                   |
| 3. ¿Preferiría padecer un problema de salud interno (más importante, pero no visible, como diabetes, hipertensión,...) en lugar de la alopecia?<br>0. No.<br>1. Sí, un poco.<br>2. Sí, bastante.<br>3. Sí, mucho. |
| 4. ¿Tiene picor o dolor en el cuero cabelludo?<br>0. No, nada.<br>1. Sí, un poco.<br>2. Sí, bastante.<br>3. Sí, mucho.                                                                                            |
| 5. ¿Le preocupa la pérdida de las cejas?<br>0. No, nada.<br>1. Sí, un poco.<br>2. Sí, bastante.<br>3. Sí, mucho.                                                                                                  |
| 6. ¿Le preocupa la pérdida de cabello?<br>0. No, nada.<br>1. Sí, un poco.<br>2. Sí, bastante.<br>3. Sí, mucho.                                                                                                    |
| 7. ¿Piensa que la alopecia altera su imagen corporal?<br>0. No, nada.<br>1. Sí, un poco.<br>2. Sí, bastante.<br>3. Sí, mucho.                                                                                     |
| <b>Social</b>                                                                                                                                                                                                     |
| 8. ¿Piensa que su alopecia interfiere en su vida laboral?<br>0. No, nada. / No, ya no trabajo.<br>1. Sí, un poco.<br>2. Sí, bastante.<br>3. Sí, mucho.                                                            |
| 9. ¿Ha dejado de ir a la peluquería o disminuido la frecuencia por la alopecia?<br>0. No.<br>1. Sí, un poco.<br>2. Sí, bastante.<br>3. Sí, mucho.                                                                 |
| 10. ¿Siente que la gente lo/la mira debido a su alopecia?<br>0. No, nada.<br>1. Sí, un poco.<br>2. Sí, bastante.<br>3. Sí, mucho.                                                                                 |
| 11. ¿Ha abandonado actividades que antes realizaba (ocio, deporte,...) por la alopecia?                                                                                                                           |

|                                                                                                                                                                                                                                                         |
|---------------------------------------------------------------------------------------------------------------------------------------------------------------------------------------------------------------------------------------------------------|
| 0. No, nada.<br>1. Sí, un poco.<br>2. Sí, bastante.<br>3. Sí, mucho.                                                                                                                                                                                    |
| 12. ¿Siente que la alopecia interfiere en su vida sexual?<br>0. No, nada.<br>1. Sí, un poco.<br>2. Sí, bastante.<br>3. Sí, mucho.                                                                                                                       |
| 13. ¿Siente que la alopecia interfiere en su relación de pareja?<br>0. No, nada.<br>1. Sí, un poco.<br>2. Sí, bastante.<br>3. Sí, mucho.                                                                                                                |
| 14. ¿Siente que la alopecia interfiere en su relación con sus amistades?<br>0. No, nada.<br>1. Sí, un poco.<br>2. Sí, bastante.<br>3. Sí, mucho.                                                                                                        |
| <b>Funcional</b>                                                                                                                                                                                                                                        |
| 15. ¿Pierde tiempo intentando ocultar la alopecia?<br>0. No, nada.<br>1. Sí, un poco.<br>2. Sí, bastante.<br>3. Sí, mucho.                                                                                                                              |
| 16. ¿Se peina diferente para intentar ocultar la alopecia?<br>0. No, nada.<br>1. Sí, un poco.<br>2. Sí, bastante.<br>3. Sí, mucho.                                                                                                                      |
| 17. ¿Ha modificado la frecuencia de peinado o lavado de cabello por miedo a incrementar la caída?<br>0. No, nada.<br>1. Sí, un poco.<br>2. Sí, bastante.<br>3. Sí, mucho.                                                                               |
| 18. ¿Consigue en algún momento olvidar su alopecia?<br>0. Sí, muchas veces.<br>1. Sí, bastantes veces.<br>2. Sí, pero pocas veces.<br>3. No, en ninguno.                                                                                                |
| 19. ¿Se pinta las cejas para ocultar el defecto o se las ha tatuado?<br>0. No. / No, no he perdido las cejas.<br>1. Sí, me las pinto ocasionalmente.<br>2. Sí, me las pinto bastantes veces.<br>3. Sí, me las pinto a diario. / Sí, las tengo tatuadas. |
| 20. ¿Utiliza algún tipo de prótesis capilar para disimular su alopecia (peluca, sistema capilar o similar)?<br>0. No, nunca.<br>1. Sí, ocasionalmente.<br>2. Sí, a menudo.<br>3. Sí, siempre.                                                           |
| <b>Puntuación:</b> afectación leve (< 21), afectación moderada (21-35), afectación severa (> 35)                                                                                                                                                        |
